# Supplementary material for: A Novel Enzyme Portfolio for Red Algal Polysaccharide Degradation in the Marine Bacterium Paraglaciecola hydrolytica S66T Encoded in a Sizeable Polysaccharide Utilization Locus
Source: PubMed Central journal article supplement (PMC5943477; doi:10.3389/fmicb.2018.00839), 2018-05-03
Supplement: Presentation_1.pdf [file Presentation_1.pdf]

## *Supplementary Material*

### **A novel enzyme portfolio for red algal polysaccharide degradation in the marine bacterium *Paraglaciecola hydrolytica* S66<sup>T</sup> encoded in a sizeable polysaccharide utilization locus**

**Mikkel Schultz-Johansen<sup>1</sup>, Pernille Kjersgaard Bech<sup>1</sup>, Rosanna Catherine Hennessy<sup>1</sup>, Mikkel Andreas Glaring<sup>1</sup>, Tristan Barbeyron<sup>2</sup>, Mirjam Czjzek<sup>2</sup> and Peter Stougaard<sup>1\*</sup>**

<sup>1</sup>Section for Microbial Ecology and Biotechnology, Department of Plant and Environmental Sciences, University of Copenhagen, Frederiksberg, Denmark

<sup>2</sup>Sorbonne Université, CNRS, Integrative Biology of Marine Models (LBI2M), Station Biologique de Roscoff (SBR), 29680 Roscoff, France

\* Correspondence: [psg@plen.ku.dk](mailto:psg@plen.ku.dk)

**Supplementary Table 1.** Primers and oligonucleotides used in this study. Overhangs designed for USER™ cloning are underlined. Restriction sites are marked in italics.

| Gene construct | Forward primer sequence (5'-3')                            | Reverse primer sequence (5'-3')                                 | Cloning strategy            | Nucleotides |
|----------------|------------------------------------------------------------|-----------------------------------------------------------------|-----------------------------|-------------|
| Ph1566         | <u>ATATGGCU</u> CAAATAATGGGCC                              | <u>ACTTCCACU</u> AGTTCTATTAAGTGTGAATG                           | pET9a-USER-2                | 67-2560     |
| Ph1586         | <u>GGCTTAAU</u> GCGTCGGTGAAG                               | <u>GGTTTAAU</u> TGCATCACAAGGAGCAC                               | pET9a-USER-1                | 67-2274     |
| Ph1589         | <u>GGCTTAAU</u> GAGATAAACAGGCC                             | <u>GGTTTAAU</u> TTTATTGTCGTTGTATCTGCGT                          | pET9a-USER-1                | 67-2331     |
| Ph1607         | <u>GGCTTAAU</u> TGTGGCGGATCG                               | <u>GGTTTAAU</u> TTTCAAGCCCTTTTAAAGGCTTTAT                       | pET9a-USER-1                | 73-2397     |
| Ph1609         | <u>GGCTTAAU</u> GAAAACGTACAATCTCCAG                        | <u>GGTTTAAU</u> TTGTTCAAAGCGCG                                  | pET9a-USER-1                | 67-2313     |
| Ph1615         | <u>GGCTTAAU</u> ATGTCAACAAACAAGATA                         | <u>GGTTTAAU</u> ATGTTTATTCTGGAAGGTAC                            | pET9a-USER-1                | 1-1077      |
| Ph1624         | <u>GGCTTAAU</u> CGACAAAACAGTGAGC                           | <u>GGTTTAAU</u> TGGTCCTTGTTCTGCC                                | pET9a-USER-1                | 100-2364    |
| Ph1631         | ATACATATGACCATGGCAGATTGGGATGAC                             | TATACTCGAGTTTGCTGTCTACCGGTTTATA                                 | pET22b ( <i>NdeI/XhoI</i> ) | 59-879      |
| Ph1636         | <u>GGCTTAAU</u> TTTTTACTGATGTCTGGTAACG                     | <u>GGTTTAAU</u> JATTTGAACGGGTATGAGCG                            | pET9a-USER-1                | 43-2199     |
| Ph1656         | <u>GGCTTAAU</u> GAGGTATTACCTTTATCAGATCA                    | <u>GGTTTAAU</u> CTTTTGCCATACTCGCA                               | pET9a-USER-1                | 178-1074    |
| Ph1657         | <u>GGCTTAAU</u> TCTGAGCAAAGTAAACAAG                        | <u>GGTTTAAU</u> AAGCGCGTTGACCTC                                 | pET9a-USER-1                | 64-2430     |
| Ph1659         | <u>GGCTTAAU</u> GTTGAGCGTCAAATGACCT                        | <u>GGTTTAAU</u> ATCACATGCAAATAGCTTTTCATT                        | pET9a-USER-1                | 58-1260     |
| Ph1663         | <u>GGCTTAAU</u> ATATTGCCATTATCAGATCCAAAA                   | <u>GGTTTAAU</u> TTCTCCTGCGGTATTTTACTAA                          | pET9a-USER-1                | 73-1389     |
| Ph1664         | <u>GGCTTAAU</u> ATGTTAAGCCTTAGCGCTTG                       | <u>GGTTTAAU</u> TTGGCGCGGTTTGTA                                 | pET9a-USER-1                | 34-966      |
| Ph1675         | <u>ATATGGCU</u> AACGTACTGCCTCTTTG                          | <u>ACTTCCACU</u> TTCTGGTGTGGCCACAC                              | pET9a-USER-2                | 103-1041    |
| USER cassette  | TATGCTGAGGCTTAATTAACCTCAGCCGCA<br>CCACCACCACCACCACCACCTAAG | GATCCTTAGTGGTGGTGGTGGTGGTGGTGGT<br>GCGGCTGAGGTTTAATTAAGCCTCAGCA | pET9a ( <i>NdeI/BamHI</i> ) |             |
| pET9a-USER-2   | <u>AGTGGAAGU</u> CCGCACCACCACCAC                           | <u>AGCCATAUG</u> TATATCTCCTTCTTAAAG                             |                             |             |

**Supplementary Table 2.** Primers used in the RT-PCR transcription analysis of genes from *Paraglaciecola hydrolytica* S66<sup>T</sup>.

| Target gene   | Forward primer sequence (5'-3') | Reverse primer sequence (5'-3') | Product length (bp) |
|---------------|---------------------------------|---------------------------------|---------------------|
| <i>gyrB</i>   | CAATCGATGAAGCTCTAGCG            | GAATAATGCAAACGCCTGAG            | 474                 |
| <i>Ph1586</i> | GTTATTTCTGAGTACGGCGC            | CAAGGAAAGCAAGGTCAACG            | 463                 |
| <i>Ph1589</i> | GCTGGATAACTTGCGCTTAC            | GTCAGAGGCAATATAACGGC            | 472                 |
| <i>Ph1596</i> | GGCGCTACAGCTATTGATTG            | CCCAGTCCATTTGCGCAATG            | 496                 |
| <i>Ph1607</i> | CGATTACATGGCGCGTTATG            | GTTTAGGGCGACCAAAACTG            | 464                 |
| <i>Ph1609</i> | GCCATCGTTGATCAGTATGG            | GCTCTTCATAGCTTGTAAC             | 458                 |
| <i>Ph1615</i> | CATATCGCTATTGCGTGGGC            | CTGGAGCCCCTTTTACATGG            | 463                 |
| <i>Ph1617</i> | CAAGTGGCATCAAGGTGATG            | GATTCGCTTTAGTGCCACTG            | 506                 |
| <i>Ph1618</i> | GGTGGTCATGTTATTTTCC             | CAATGGGCAATAAAGGGCAC            | 485                 |
| <i>Ph1624</i> | GGTATCGATTATCGCGATCC            | GCAAATACTGGATCAAAGGG            | 495                 |
| <i>Ph1629</i> | GATGATCATAAACCGACTCC            | CAAAAACTCTGACCATCGAG            | 458                 |
| <i>Ph1631</i> | GCAGATTGGGATGACATTCC            | GGCTCACGTACAAAAACATG            | 476                 |
| <i>Ph1636</i> | GTTTGGTGGTTTGTGGATCC            | CTAGGATCAAACACATCGTG            | 449                 |
| <i>Ph1646</i> | GGCTATAGTTACCAGTCTG             | GGCGTGGATTTTGTCAAAC             | 473                 |
| <i>Ph1647</i> | CATGAACATGCCAATGAGCG            | GTCGATCATGGCGATAGCAC            | 450                 |
| <i>Ph1648</i> | CGCCGGATATTTTACTGGTG            | CACTCATGAACACAATCAGG            | 506                 |
| <i>Ph1656</i> | CTGTTTACCAACACCCAGAC            | GCCACCCGAAAACCTAAATC            | 457                 |
| <i>Ph1659</i> | GACATCACTGTCATCAATGC            | CAACTCACAAGGTACAAAGG            | 474                 |
| <i>Ph1663</i> | CGAAAATATCACCACAGCCG            | CTTTACTGGGAATGCCATGC            | 455                 |
| <i>Ph1664</i> | CGATGATTGGGAATACGTAG            | CATGTCCAGCACTTCTGGTC            | 482                 |
| <i>Ph1675</i> | GAGCCCGACTTTCCTTTTAG            | GCTTCGCTAAAAAGCTTGCC            | 467                 |

**Supplementary Table 3:** Enzymes from *P. hydrolytica* S66<sup>T</sup> located in a PUL-like gene cluster and with a proposed involvement in the degradation of red algal polysaccharides. Characterized homologs are indicated together with the putative function. \*Ph1592/93 each represents part of the 2-keto-3-deoxy-L-galactonate-5-dehydrogenase, but was split in the automatic annotation procedure due to a sequencing gap. Percent identity is reported for the closest hit in the PDB database or alternatively for characterized homologs obtained from the studies of <sup>1</sup>(Lee et al., 2014a), <sup>2</sup>(Ficko-Blean et al., In Press), <sup>3</sup>(Prechoux et al., 2016), <sup>4</sup>(Prechoux et al., 2013), <sup>5</sup>(Lee et al., 2014b), <sup>6</sup>(Lee et al., 2016).

| Locus tag  | Enzyme family | Predicted function                               | Accession no. of best characterized hit                              | Percent identity     |
|------------|---------------|--------------------------------------------------|----------------------------------------------------------------------|----------------------|
| Ph1566     | GH2           | Agarolytic $\beta$ -galactosidase                | AEX22320.1 ( <i>Vibrio</i> sp. EYJ3)                                 | 40 % <sup>1</sup>    |
| Ph1567     | GH29          | $\alpha$ -fucosidase                             | 4NI3_A ( <i>Fusarium graminearum</i> )                               | 34 %                 |
| Ph1570     | GH63          | Mannosylglycerate hydrolase                      | 4WVA_A ( <i>Thermus thermophilus</i> HB8)                            | 43 %                 |
| Ph1586     | GH86          | $\beta$ -Porphyranase                            | 4AW7_A ( <i>Bacteroides Plebeius</i> M12 <sup>T</sup> )              | 33 %                 |
| Ph1589     | GH50          | Exo- $\beta$ -agarase                            | 4BQ2_A ( <i>Saccharophagus degradans</i> 2-40 <sup>T</sup> )         | 46 %                 |
| Ph1607     | GH86          | $\beta$ -Porphyranase                            | 4AW7_A ( <i>Bacteroides Plebeius</i> M12 <sup>T</sup> )              | 33 %                 |
| Ph1609     | GH50          | Exo- $\beta$ -agarase                            | 4BQ2_A ( <i>Saccharophagus degradans</i> 2-40 <sup>T</sup> )         | 61 %                 |
| Ph1615     | GH117         | $\alpha$ -1,3-(3,6-anhydro)-L-galactosidase      | 3R4Y_A ( <i>Saccharophagus degradans</i> 2-40 <sup>T</sup> )         | 73 %                 |
| Ph1624     | GH50          | Exo- $\beta$ -agarase                            | 4BQ2_A ( <i>Saccharophagus degradans</i> 2-40 <sup>T</sup> )         | 47 %                 |
| Ph1631     | GH16          | $\beta$ -agarase                                 | 3WZ1_A ( <i>Microbulbifer thermotolerans</i> JAMB A94 <sup>T</sup> ) | 68 %                 |
| Ph1636     | GH50          | Exo- $\beta$ -agarase                            | 4BQ2_A ( <i>Saccharophagus degradans</i> 2-40 <sup>T</sup> )         | 31 %                 |
| Ph1646     | GH16          | $\beta$ -Porphyranase                            | 4ATE_A ( <i>Zobellia galactanivorans</i> Dsij <sup>T</sup> )         | 33 %                 |
| Ph1650     | GH127         | $\alpha$ -1,3-(3,6-anhydro)-D-galactosidase      | ZGAL_3148/ZGAL_3150 ( <i>Z. galactanivorans</i> Dsij <sup>T</sup> )  | 60/62 % <sup>2</sup> |
| Ph1656     | GH16          | $\beta$ -Porphyranase                            | 3JUJ_A ( <i>Zobellia galactanivorans</i> Dsij <sup>T</sup> )         | 26 %                 |
| Ph1657     | GH42-like     | $\beta$ -galactosidase                           | 5DFA_A ( <i>Geobacillus stearothermophilus</i> T6)                   | 18 %                 |
| Ph1659     | GH82          | $\iota$ -carrageenase                            | 1H80_A (" <i>Alteromonas fortis</i> " 1)                             | 33 %                 |
| Ph1663     | GH16          | $\beta$ -Porphyranase                            | 4ATE_A ( <i>Zobellia galactanivorans</i> Dsij <sup>T</sup> )         | 29 %                 |
| Ph1664     | GH16          | $\kappa$ -carrageenase                           | 1DYP_A ( <i>Pseudoalteromonas carrageenovora</i> 9 <sup>T</sup> )    | 40 %                 |
| Ph1675     | GH16          | $\beta$ -Porphyranase                            | 4ATE_A ( <i>Zobellia galactanivorans</i> Dsij <sup>T</sup> )         | 27 %                 |
| Ph1596     | S1_15         | Sulfatase                                        | 1E2S_P ( <i>Homo sapiens</i> )                                       | 27 %                 |
| Ph1617     | S1_19         | Endo-4S- $\kappa$ -carrageenan sulfatase         | ABG39421.1 ( <i>Pseudoalteromonas atlantica</i> T6c)                 | 58 % <sup>3</sup>    |
| Ph1618     | S1_19         | Sulfatase                                        | 1FSU_A ( <i>Homo sapiens</i> )                                       | 35 %                 |
| Ph1629     | S1_24         | Sulfatase                                        | 3ED4_A ( <i>Escherichia coli</i> O6:H1 UPEC)                         | 26 %                 |
| Ph1647     | S1_N.C.       | Sulfatase                                        | 4UPH_A ( <i>Rhizobium radiobacter</i> K84)                           | 29 %                 |
| Ph1648     | S1_19         | Endo-4S- $\iota$ -carrageenan sulfatase          | ABG39415.1 ( <i>Pseudoalteromonas atlantica</i> T6c)                 | 76 % <sup>4</sup>    |
| Ph1677     | S1_19         | Endo-4S- $\kappa$ -carrageenan sulfatase         | ABG39421.1 ( <i>Pseudoalteromonas atlantica</i> T6c)                 | 83 % <sup>3</sup>    |
| Ph1595     | -             | L-AHG dehydrogenase                              | ABG41069.1 ( <i>Pseudoalteromonas atlantica</i> T6c)                 | 87 % <sup>5</sup>    |
| Ph1591     | -             | L-AHG cycloisomerase                             | ABG41066.1 ( <i>Pseudoalteromonas atlantica</i> T6c)                 | 71 % <sup>5</sup>    |
| Ph1592/93* | -             | 2-keto-3-deoxy-L-galactonate-5-dehydrogenase     | ABG41067.1 ( <i>Pseudoalteromonas atlantica</i> T6c)                 | 92/89 % <sup>5</sup> |
| Ph1594     | -             | 2,5-diketo-3-deoxy-L-galactonate-5-dehydrogenase | ABG41068.1 ( <i>Pseudoalteromonas atlantica</i> T6c)                 | 89 % <sup>5</sup>    |
| Ph1616     | -             | KDG kinase                                       | ABG40487.1 ( <i>Pseudoalteromonas atlantica</i> T6c)                 | 49 % <sup>5</sup>    |
| Ph1678     | -             | D-AHG dehydrogenase                              | ABG39422.1 ( <i>Pseudoalteromonas atlantica</i> T6c)                 | 69 % <sup>6</sup>    |
| Ph1679     | -             | D-AHG cycloisomerase                             | ABG39423.1 ( <i>Pseudoalteromonas atlantica</i> T6c)                 | 87 % <sup>6</sup>    |
| Ph1680     | -             | 2-keto-3-deoxy-D-galactonate kinase              | ABG39424.1 ( <i>Pseudoalteromonas atlantica</i> T6c)                 | 44 % <sup>6</sup>    |
| Ph1681     | -             | 2-keto-3-deoxy-6-phospho-D-galactonate aldolase  | ABG39425.1 ( <i>Pseudoalteromonas atlantica</i> T6c)                 | 66 % <sup>6</sup>    |

**Supplementary Table 4:** Yield of RNA recovered from S66T cells grown on different carbon sources. DNase treatment was performed on extracted RNA and PCR amplification was used to verify the complete removal of genomic DNA prior to cDNA synthesis.

| Substrate/Replicate | Crude RNA (ng/μl) |     |     | DNase Treated RNA (ng/μl) |      |      |
|---------------------|-------------------|-----|-----|---------------------------|------|------|
|                     | R1                | R2  | R3  | R1                        | R2   | R3   |
| Agarose*            | 540               | 560 | 550 | 17.9                      | 21.5 | 14.8 |
| Agar*               | 108               | 313 | 231 | 11.8                      | 16.1 | 19.1 |
| Porphyran           | 283               | 225 | 145 | 240                       | 258  | 131  |
| Glucose             | 380               | 353 | 342 | 367                       | 299  | 232  |

\*Rigorous DNase treatment performed to remove contaminating genomic DNA.

**Supplementary Figure 1:** Structural representation of repetitive disaccharide motifs (*-bioses*) commonly found in agar (**A**) and carrageenan (**B**). A “Neo” prefix is used to distinguish motifs with an  $\alpha$ -1,3 moiety at the non-reducing end from those with a  $\beta$ -1,4 moiety at the non-reducing end (as exemplified for two of the structural representations).

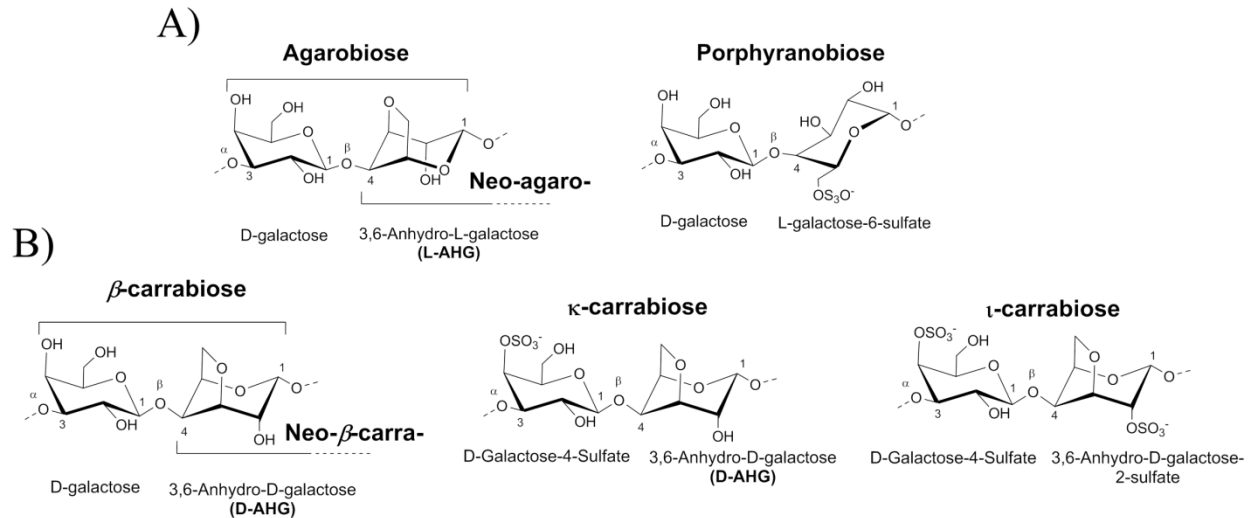

**Supplementary Figure 2:** RT-PCR transcription analysis of GH genes within the PUL-like cluster. Gene induction was tested for biological replicates of *P. hydrolytica* S66<sup>T</sup> grown in the presence of agar-type substrates relative to a glucose control. *gyrB* was used as reference gene. **A):** Agarolytic genes, **B):** Carrageenolytic genes, **C):** Sulfatases

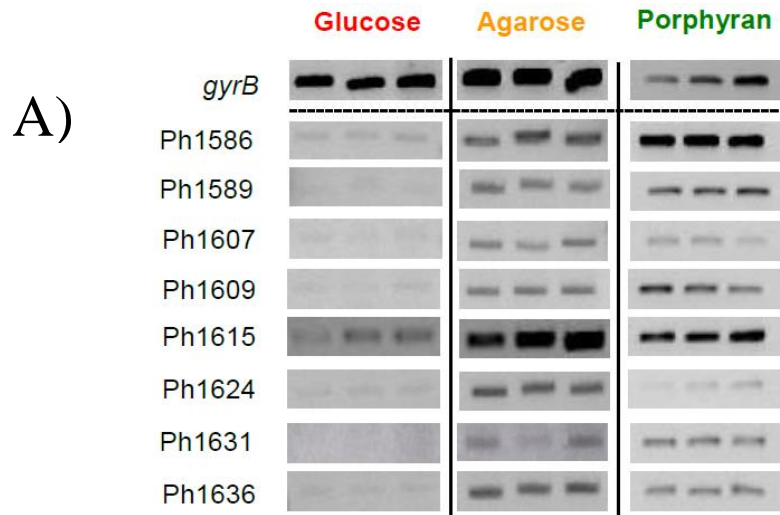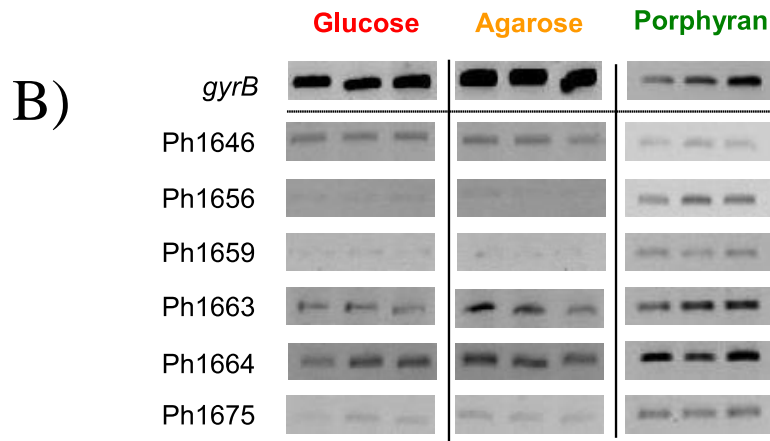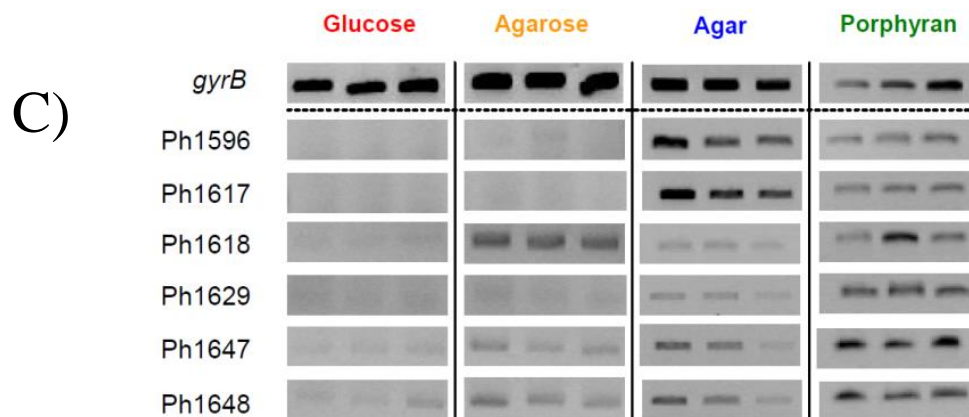

**Supplementary Figure 3:** Genomic organization of L-AHG and D-AHG metabolizing genes in *P. hydrolytica* S66<sup>T</sup>, *Z. galactanivorans* and *P. atlantica*. Genes are colour-coded according to function and the shared sequence identities (protein) between the organisms are shown. \* indicates that gene functions have been experimentally verified.

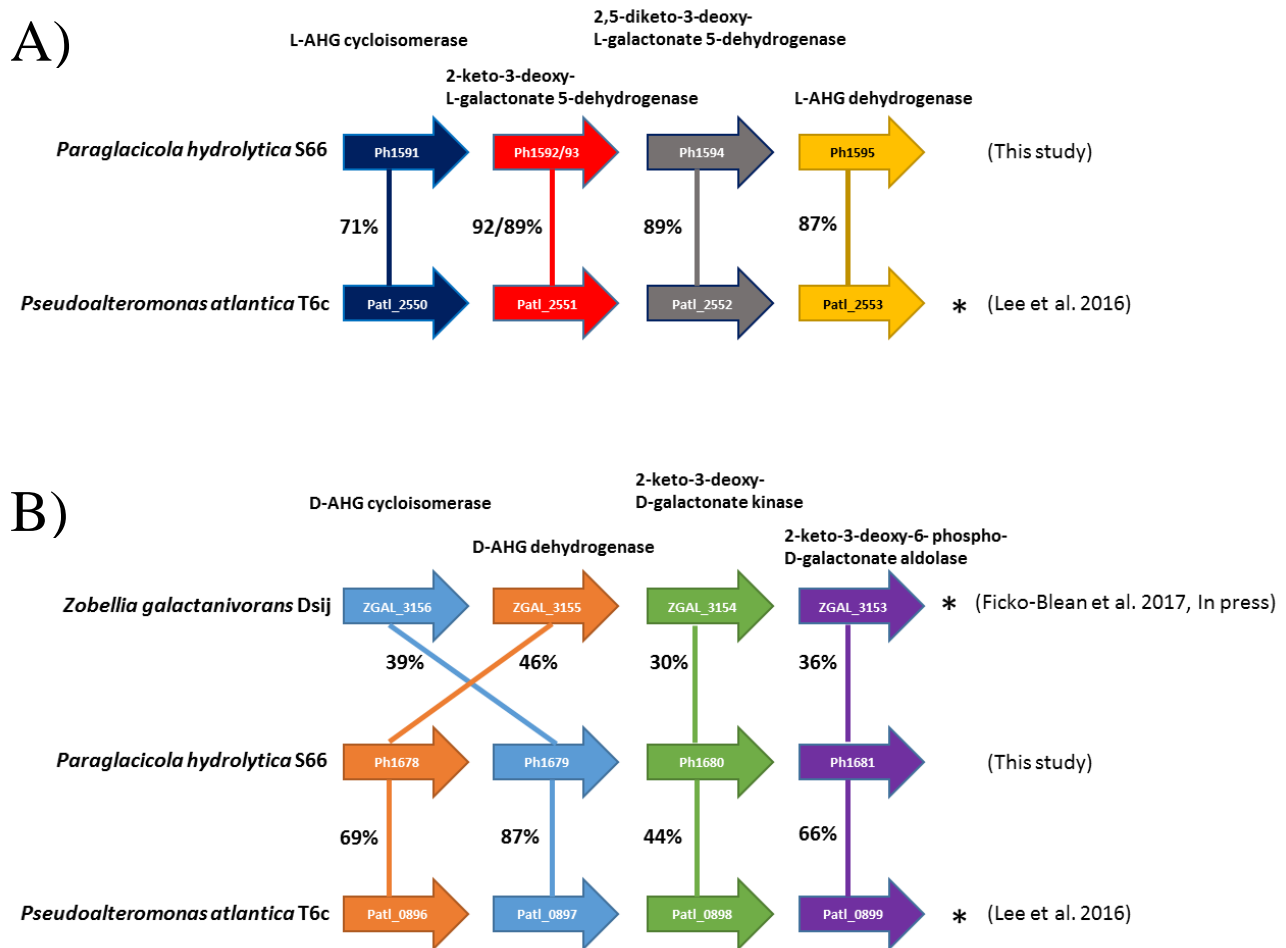



## References

- Ficko-Blean, E., Préchoux, A., Thomas, F., Rochat, T., Larocque, R., Zhu, Y., et al. (In Press). Carrageenan catabolism is encoded by a complex regulon in marine heterotrophic bacteria. *Nature Communications* doi: 10.1038/s41467-017-01832-6.
- Lee, C.H., Kim, H.T., Yun, E.J., Lee, A.R., Kim, S.R., Kim, J.H., et al. (2014a). A novel agarolytic beta-galactosidase acts on agarooligosaccharides for complete hydrolysis of agarose into monomers. *Appl Environ Microbiol* 80(19), 5965-5973. doi: 10.1128/AEM.01577-14.
- Lee, S.B., Cho, S.J., Kim, J.A., Lee, S.Y., Kim, S.M., and Lim, H.S. (2014b). Metabolic pathway of 3,6-anhydro-L-galactose in agar-degrading microorganisms. *Biotechnology and Bioprocess Engineering* 19(5), 866-878. doi: 10.1007/s12257-014-0622-3.
- Lee, S.B., Kim, J.A., and Lim, H.S. (2016). Metabolic pathway of 3,6-anhydro-D-galactose in carrageenan-degrading microorganisms. *Applied Microbiology and Biotechnology* 100(9), 4109-4121. doi: 10.1007/s00253-016-7346-6.
- Prechoux, A., Genicot, S., Rogniaux, H., and Helbert, W. (2013). Controlling carrageenan structure using a novel formylglycine-dependent sulfatase, an endo-4S-iota-carrageenan sulfatase. *Mar Biotechnol (NY)* 15(3), 265-274. doi: 10.1007/s10126-012-9483-y.
- Prechoux, A., Genicot, S., Rogniaux, H., and Helbert, W. (2016). Enzyme-Assisted Preparation of Furcellaran-Like kappa-/beta-Carrageenan. *Mar Biotechnol (NY)* 18(1), 133-143. doi: 10.1007/s10126-015-9675-3.
