# Supplementary material for: A Novel Enzyme Portfolio for Red Algal Polysaccharide Degradation in the Marine Bacterium Paraglaciecola hydrolytica S66T Encoded in a Sizeable Polysaccharide Utilization Locus
Source: Front Microbiol. 2018 May 3;9:839. doi: 10.3389/fmicb.2018.00839 (PMC5943477; doi:10.3389/fmicb.2018.00839)
Supplement: Supplementary file 2 [file Data_Sheet_1.XLSX]

## Sheet: Supplementary Data Sheet 1
Supplementary Data Sheet 1: Occurence of CAZymes and sulfatases in the genome of P. hydrolytica S66T identified by Hidden Markov Model and BLASTp search against the dbCAN (http://csbl.bmb.uga.edu/dbCAN/) and SulfAtlas (http://abims.sb-roscoff.fr/sulfatlas/?execution=e1s1) databases. Cutoff value: 10E-5
Search results			CAZy and sulfatase families			Total (no.)
CAZy/enzyme family	Locus tag		HMM module	Occurences		CAZymes	Sulfatases
GH3	Ph1002		GH1	1		GH (111)	S1 (11)
GH20	Ph1026		GH2	3		GT (35)	S4 (1)
CBM50	Ph104		GH3	4		PL (17)
PL14	Ph1045		GH4	0		CE (58)
Sulfatase_S1_61	Ph1048		GH5	6		AA (11)
CBM40	Ph1067		GH6	0		CBM (36)
CBM9	Ph1083		GH7	0		270	12
AA3	Ph1087		GH8	0
CBM66	Ph1088		GH9	1
CE4	Ph1122		GH10	5
GH13	Ph113		GH11	1
GH109	Ph1139		GH12	1
CE1	Ph114		GH13	9
CE6	Ph1142		GH14	0
GH5	Ph1153		GH15	1
GH31	Ph116		GH16	8
GH18	Ph1273		GH17	0
CBM56	Ph1275		GH18	1
GH16	Ph1275		GH19	0
CE10	Ph1286		GH20	1
CBM50	Ph1295		GH21	0
GH10	Ph1331		GH22	0
GT5	Ph1338		GH23	6
CE1	Ph1349		GH24	0
CE10	Ph1352		GH25	0
CE10	Ph1362		GH26	0
PL22	Ph1362		GH27	0
GH20	Ph1378		GH28	3
CBM50	Ph1391		GH29	1
GH23	Ph1391		GH30	0
CE1	Ph1425		GH31	2
CE1	Ph1426		GH32	0
CBM70	Ph1431		GH33	1
CE4	Ph1476		GH34	0
CE4	Ph1477		GH35	1
GT35	Ph1553		GH36	0
GH2	Ph1566		GH37	0
GH29	Ph1567		GH38	0
GH63	Ph1570		GH39	0
CE2	Ph1580		GH40	0
CBM6	Ph1586		GH41	0
GH86	Ph1586		GH42	1
GH50	Ph1589		GH43	12
Sulfatase_S1_15	Ph1596		GH44	0
GH86	Ph1607		GH45	0
GH50	Ph1609		GH46	0
GH117	Ph1615		GH47	0
Sulfatase_S1_19	Ph1617		GH48	0
Sulfatase_S1_19	Ph1618		GH49	0
GH50	Ph1624		GH50	4
Sulfatase_S1_24	Ph1629		GH51	1
GH16	Ph1631		GH52	0
GH50	Ph1636		GH53	0
CBM32	Ph1638		GH54	0
CE1	Ph1642		GH55	0
GH16	Ph1646		GH56	0
Sulfatase_S1_NC	Ph1647		GH57	0
Sulfatase_S1_19	Ph1648		GH58	0
GH127	Ph1650		GH59	0
GH16	Ph1656		GH60	0
GH82	Ph1659		GH61	0
GH16	Ph1663		GH62	0
GH16	Ph1664		GH63	1
GH16	Ph1675		GH64	0
Sulfatase_S1_19	Ph1677		GH65	1
AA6	Ph1720		GH66	0
GH105	Ph177		GH67	1
CE10	Ph1815		GH68	0
PL22	Ph1815		GH69	0
GH5	Ph184		GH70	0
CE4	Ph1843		GH71	0
GH94	Ph185		GH72	0
GH74	Ph1888		GH73	2
GH105	Ph1903		GH74	1
GH28	Ph1913		GH75	0
PL1	Ph1918		GH76	1
CE8	Ph1920		GH77	1
PL1	Ph1920		GH78	2
CE12	Ph1923		GH79	0
CE3	Ph1935		GH80	0
GH95	Ph1938		GH81	0
GH35	Ph1942		GH82	1
CE2	Ph1978		GH83	0
GT4	Ph1981		GH84	0
AA7	Ph2028		GH85	0
GH15	Ph2032		GH86	2
GT51	Ph2043		GH87	0
GH23	Ph2107		GH88	0
CBM50	Ph2136		GH89	0
GT51	Ph2166		GH90	0
CE1	Ph2169		GH91	0
GT2	Ph2198		GH92	0
GH43	Ph2272		GH93	0
GH10	Ph2273		GH94	2
CE3	Ph2274		GH95	1
GH129	Ph2350		GH96	0
CE1	Ph2369		GH97	0
AA3	Ph2413		GH98	0
CE4	Ph2422		GH99	0
PL1	Ph2425		GH100	0
GT4	Ph2427		GH101	0
GT4	Ph2428		GH102	0
GT2	Ph2435		GH103	3
GT94	Ph2437		GH104	0
GT2	Ph2443		GH105	5
GT4	Ph2444		GH106	0
GT2	Ph2446		GH107	0
GT4	Ph2448		GH108	0
GH3	Ph245		GH109	6
CE4	Ph2451		GH110	0
GT4	Ph2452		GH111	0
GT2	Ph2453		GH112	0
AA4	Ph2457		GH113	0
CE10	Ph2516		GH114	0
GH11	Ph2606		GH115	2
CBM20	Ph263		GH116	0
GH103	Ph2634		GH117	1
CBM50	Ph2641		GH118	0
CE4	Ph2643		GH119	0
GH43	Ph2684		GH120	0
GH43	Ph2686		GH121	0
CE10	Ph271		GH122	0
GT4	Ph2740		GH123	0
GH31	Ph2754		GH124	0
GH65	Ph2755		GH125	0
GT4	Ph2822		GH126	0
GT2	Ph2824		GH127	2
GT4	Ph2826		GH128	0
GH13	Ph287		GH129	1
CE10	Ph2887		GH130	1
GH23	Ph2891		GH131	0
GH43	Ph2900		GH132	0
GH43	Ph2901		GH133	0
GH43	Ph2905		GH134	0
GH127	Ph2906		GH135	0
PL17	Ph2911		GT1	0
GH105	Ph2918		GT2	10
PL22	Ph2920		GT3	0
GH43	Ph2921		GT4	12
Sulfatase_S1_8	Ph2965		GT5	1
CE1	Ph2970		GT6	0
GT2	Ph2992		GT7	0
CE14	Ph3001		GT8	0
GT2	Ph3005		GT9	0
GT2	Ph3006		GT10	0
GH13	Ph3038		GT11	0
Sulfatase_S1_65	Ph3049		GT12	0
GH109	Ph3135		GT13	0
CE1	Ph3145		GT14	0
CBM50	Ph3165		GT15	0
CE1	Ph3227		GT16	0
GH73	Ph323		GT17	0
GH13	Ph3242		GT18	0
GT81	Ph3243		GT19	1
GH1	Ph3266		GT20	0
GH3	Ph3267		GT21	0
GH16	Ph3268		GT22	0
CE1	Ph3292		GT23	0
CE1	Ph3293		GT24	0
GH10	Ph3300		GT25	0
CE6	Ph3308		GT26	1
GH130	Ph3317		GT27	1
GH76	Ph3318		GT28	3
GH5	Ph3319		GT29	0
AA3	Ph3331		GT30	1
PL22	Ph3361		GT31	0
GH5	Ph3369		GT32	0
CE4	Ph3373		GT33	0
GH23	Ph3394		GT34	0
GH23	Ph3404		GT35	1
GH73	Ph3460		GT36	0
GT28	Ph3479		GT37	0
GT28	Ph3589		GT38	0
CE11	Ph3595		GT39	0
PL6	Ph3641		GT40	0
CBM32	Ph3653		GT41	0
GH78	Ph3667		GT42	0
GH105	Ph3678		GT43	0
GH103	Ph3700		GT44	0
CE1	Ph3714		GT45	0
GT27	Ph3744		GT46	0
GT26	Ph3745		GT47	0
CBM8	Ph3774		GT48	0
CBM44	Ph3776		GT49	0
GH12	Ph3777		GT50	0
CE10	Ph3778		GT51	2
CE10	Ph3804		GT52	0
GH109	Ph3824		GT53	0
GH43	Ph3826		GT54	0
GH13	Ph3872		GT55	0
AA3	Ph3881		GT56	0
GH10	Ph3883		GT57	0
Sulfatase_S1_34	Ph3885		GT58	0
PL22	Ph3894		GT59	0
CE4	Ph3896		GT60	0
CBM35	Ph3911		GT61	0
CE12	Ph3911		GT62	0
CBM35	Ph3913		GT63	0
PL11	Ph3913		GT64	0
CE12	Ph3950		GT65	0
CBM50	Ph3988		GT66	0
CBM32	Ph4023		GT67	0
PL7	Ph4023		GT68	0
CE10	Ph4024		GT69	0
PL7	Ph4028		GT70	0
GT19	Ph4085		GT71	0
GT4	Ph4104		GT72	0
GT4	Ph4105		GT73	0
AA3	Ph4109		GT74	0
GH67	Ph4120		GT75	0
AA2	Ph4123		GT76	0
GH43	Ph4129		GT77	0
GH115	Ph4130		GT78	0
CE12	Ph4132		GT79	0
GH42	Ph4136		GT80	0
GH28	Ph4138		GT81	1
CBM66	Ph4154		GT82	0
CBM44	Ph4187		GT83	0
GH3	Ph4199		GT84	0
GH115	Ph4209		GT85	0
GH43	Ph4210		GT86	0
CBM30	Ph4211		GT87	0
GH9	Ph4211		GT88	0
GH13	Ph4221		GT89	0
CE1	Ph4240		GT90	0
CE10	Ph4252		GT91	0
GH2	Ph4256		GT92	0
GH94	Ph4271		GT93	0
CBM13	Ph4280		GT94	1
GH43	Ph4280		GT95	0
CE1	Ph4372		GT96	0
GH109	Ph4415		GT97	0
CBM66	Ph4417		GT98	0
GH109	Ph4491		PL1	4
GH3	Ph4514		PL2	0
CE10	Ph4515		PL3	0
Sulfatase_S4	Ph4518		PL4	0
GH43	Ph4529		PL5	0
CBM67	Ph4546		PL6	1
GH78	Ph4546		PL7	2
GH28	Ph4548		PL8	0
GH33	Ph4549		PL9	1
GH105	Ph4551		PL10	1
PL1	Ph4553		PL11	1
PL10	Ph4555		PL12	0
CE10	Ph4558		PL13	0
CE1	Ph4591		PL14	1
CE10	Ph4609		PL15	0
GH5	Ph4688		PL16	0
GT28	Ph4695		PL17	1
CBM32	Ph4699		PL18	0
CE10	Ph477		PL19	0
CBM50	Ph485		PL20	0
GH10	Ph522		PL21	0
GH5	Ph538		PL22	5
GH2	Ph539		PL23	0
GH109	Ph549		CE1	17
AA3	Ph553		CE2	2
CE10	Ph595		CE3	3
AA12	Ph597		CE4	9
CE3	Ph639		CE5	0
CE1	Ph669		CE6	2
GT30	Ph692		CE7	0
GT4	Ph693		CE8	1
GT2	Ph697		CE9	1
GH51	Ph747		CE10	17
PL9	Ph75		CE11	1
CE9	Ph780		CE12	4
GH23	Ph793		CE13	0
GH103	Ph9		CE14	1
CBM48	Ph914		CE15	0
GH13	Ph914		CE16	0
CBM48	Ph915		AA1	0
GH13	Ph915		AA2	1
GH77	Ph916		AA3	6
CE10	Ph921		AA4	1
CBM50	Ph947		AA5	0
CBM41	Ph95		AA6	1
CBM48	Ph95		AA7	1
CBM69	Ph95		AA8	0
GH13	Ph95		AA9	0
CBM69	Ph961		AA10	0
			AA11	0
			AA12	1
			AA13	0
			CBM1	0
			CBM2	0
			CBM3	0
			CBM4	0
			CBM5	0
			CBM6	1
			CBM7	0
			CBM8	1
			CBM9	1
			CBM10	0
			CBM11	0
			CBM12	0
			CBM13	1
			CBM14	0
			CBM15	0
			CBM16	0
			CBM17	0
			CBM18	0
			CBM19	0
			CBM20	1
			CBM21	0
			CBM22	0
			CBM23	0
			CBM24	0
			CBM25	0
			CBM26	0
			CBM27	0
			CBM28	0
			CBM29	0
			CBM30	1
			CBM31	0
			CBM32	4
			CBM33	0
			CBM34	0
			CBM35	2
			CBM36	0
			CBM37	0
			CBM38	0
			CBM39	0
			CBM40	1
			CBM41	1
			CBM42	0
			CBM43	0
			CBM44	2
			CBM45	0
			CBM46	0
			CBM47	0
			CBM48	3
			CBM49	0
			CBM50	9
			CBM51	0
			CBM52	0
			CBM53	0
			CBM54	0
			CBM55	0
			CBM56	1
			CBM57	0
			CBM58	0
			CBM59	0
			CBM60	0
			CBM61	0
			CBM62	0
			CBM63	0
			CBM64	0
			CBM65	0
			CBM66	3
			CBM67	1
			CBM68	0
			CBM69	2
			CBM70	1
			CBM71	0
			Sulfatase_S1_8	1
			Sulfatase_S1_15	1
			Sulfatase_S1_19	4
			Sulfatase_S1_24	1
			Sulfatase_S1_34	1
			Sulfatase_S1_61	1
			Sulfatase_S1_65	1
			Sulfatase_S1_NC	1
			Sulfatase_S4	1
